# Supplementary material for: Novel peptides for small-caliber graft functionalization selected by a phage display of endothelial-positive/platelet-negative combined selection
Source: Royal Society of Chemistry journal article supplement (doi:10.1039/c7tb02652h), 2017-01-01
Supplement: c7tb02652h1.pdf [file c7tb02652h1.pdf]

Reference sequence (1): S0

Identities normalised by aligned length.

Colored by: identity + property

|    |     | 1 [ . ] 12          |
|----|-----|---------------------|
| 1  | S0  | 100.0% SFKIPYHYDScQ |
| 2  | S1  | 0.0% HGGVRLY-----   |
| 3  | S2  | 0.0% GQSEKHL-----   |
| 4  | S3  | 14.3% SLSKWSF-----  |
| 5  | S4  | 0.0% KIAVIST-----   |
| 6  | S5  | 0.0% TDNTKPK-----   |
| 7  | S6  | 0.0% TNWRTIN-----   |
| 8  | S7  | 0.0% VSRDTPQ-----   |
| 9  | S8  | 0.0% TIPRAPSPANTY   |
| 10 | S9  | 0.0% NRPDSAQFWLHH   |
| 11 | S10 | 8.3% DSSNPiFWRPSS   |
| 12 | S11 | 0.0% FYRHDTYNTHHT   |
| 13 | S12 | 8.3% HTKQIPRHIYSA   |
| 14 | S13 | 28.6% HAIYPRH-----  |
| 15 | S14 | 0.0% LNHHLGF-----   |
| 16 | S15 | 0.0% CQLLSARSC---   |
| 17 | S16 | 16.7% SVFLPTRHSPDL  |
| 18 | S17 | 0.0% ATTHRDVQNAFR   |
| 19 | S18 | 8.3% QTNDTSRQPSYR   |
| 20 | S19 | 0.0% AALSMPP-----   |
| 21 | S20 | 16.7% HYQHNTHPSPRW  |
| 22 | S21 | 25.0% SHHIPSQWPLH   |
| 23 | S22 | 14.3% SVQLQQQ-----  |
| 24 | S23 | 25.0% LVSKPYSLTKGI  |
| 25 | S24 | 0.0% QTAGKFNSAAHP   |
| 26 | S25 | 0.0% HSMPYGLVSGSK   |
| 27 | S26 | 0.0% THHTLFS-----   |
| 28 | S27 | 0.0% QPWPTSI-----   |
| 29 | S28 | 0.0% TPTLIKG-----   |
| 30 | S29 | 8.3% TTVYPARWGAHP   |
| 31 | S30 | 0.0% CNNQMLERC---   |
| 32 | S31 | 0.0% GTTTWLY-----   |
| 33 | S32 | 0.0% LAHNRTS-----   |
| 34 | S33 | 0.0% ETALIAA-----   |
| 35 | S34 | 0.0% LPVRLDW-----   |
| 36 | S35 | 8.3% SWMPHPRWSPQH   |
| 37 | S36 | 0.0% VNTGMGSRLTYM   |
| 38 | S37 | 16.7% SSYYPQLTAHRF  |
| 39 | S38 | 0.0% HTSSSVKMSDVL   |
| 40 | S39 | 8.3% DVQEKGHVNLNR   |
| 41 | S40 | 28.6% YPAIHYL-----  |
| 42 | S41 | 8.3% SLHSKAYERPLS   |
| 43 | S42 | 0.0% QLPHTVL-----   |
| 44 | S43 | 0.0% ETPLQKS-----   |
| 45 | S44 | 0.0% LARDVOI-----   |
| 46 | S45 | 14.3% KLPVLYA-----  |
| 47 | S46 | 0.0% VNPHYLQ-----   |
| 48 | S47 | 8.3% QHYNIVNTQSRV   |
| 49 | S48 | 0.0% LPIVKAL-----   |
| 50 | S49 | 0.0% QSHYRHISPAQV   |
| 51 | S50 | 0.0% DLNYFTLSSKRE   |
| 52 | S51 | 0.0% CYQLNTSQC---   |
| 53 | S52 | 0.0% GSELYGL-----   |
| 54 | S53 | 14.3% QLWAPPW-----  |
| 55 | S54 | 0.0% YIGSQTNERYS    |
| 56 | S55 | 8.3% FHVNPSTPTHPL   |
| 57 | S56 | 8.3% RADALNSHLS     |
| 58 | S57 | 8.3% LPPEELRSRLL    |
| 59 | S58 | 0.0% KNLNTTAMYAAS   |
| 60 | S59 | 0.0% NYHLTHPHILKT   |
| 61 | S60 | 0.0% FAIPLVP-----   |
| 62 | S61 | 8.3% SVSVGMPKSPRP   |
| 63 | S62 | 0.0% GQSPHSYQPRTY   |
| 64 | S63 | 8.3% AQPNTSLRSLP    |

|     |     |       |               |
|-----|-----|-------|---------------|
| 65  | S64 | 28.6% | LPTPGYH-----  |
| 66  | S65 | 8.3%  | HYISPAWPTPPA  |
| 67  | S66 | 0.0%  | QHANHQAANNLR  |
| 68  | S67 | 0.0%  | TLPHTRL-----  |
| 69  | S68 | 8.3%  | GSLNESWLSKFK  |
| 70  | S69 | 16.7% | YHKPPSPTPLPA  |
| 71  | S70 | 0.0%  | HSITKPL-----  |
| 72  | S71 | 0.0%  | GETRAPL-----  |
| 73  | S72 | 0.0%  | MPAVMSSAQVPR  |
| 74  | S73 | 0.0%  | APIHLHSPKLLH  |
| 75  | S74 | 0.0%  | ERSWTLDSALSM  |
| 76  | S75 | 20.0% | IPLVP-----    |
| 77  | S76 | 33.3% | STGKPYMMLTGV  |
| 78  | S77 | 14.3% | GSHNPHL-----  |
| 79  | S78 | 0.0%  | AKALYSANAPAV  |
| 80  | S79 | 0.0%  | NHWASPR-----  |
| 81  | S80 | 0.0%  | WSPGQQLHNST   |
| 82  | S81 | 0.0%  | TTGQAWR-----  |
| 83  | S82 | 0.0%  | KPLNMTLWPHPI  |
| 84  | S83 | 0.0%  | LIPGYSTSYQLS  |
| 85  | S84 | 14.3% | STASYTR-----  |
| 86  | S85 | 0.0%  | MPAVMSSVQVPR  |
| 87  | S86 | 0.0%  | ALLTGPR-----  |
| 88  | S87 | 0.0%  | HHEPGAWLPLSP  |
| 89  | S88 | 0.0%  | CVARGAQTC---  |
| 90  | S89 | 0.0%  | ATGTNPPGSALS  |
| 91  | S90 | 0.0%  | ALHSARV-----  |
| 92  | S1  | 0.0%  | GPLWSSN-----  |
| 93  | S1  | 14.3% | SNQWYAS-----  |
| 94  | S1  | 0.0%  | WAPGSMPTSRLA  |
| 95  | S1  | 0.0%  | DLQSGPMLYWAN  |
| 96  | S1  | 25.0% | FPLLPGPHLSPQ  |
| 97  | S1  | 0.0%  | QPPSINLTLYPM  |
| 98  | S1  | 0.0%  | CPTPHSGTC---  |
| 99  | S1  | 16.7% | AMNPRNHSDPSV  |
| 100 | S1  | 8.3%  | SVLPSMRLYTQP  |
| 101 | S1  | 9.1%  | SNALTDPSRYP-  |
| 102 | S1  | 8.3%  | HKAPSPKFDWVP  |
| 103 | S1  | 0.0%  | CHHAWPRGC---  |
| 104 | S1  | 8.3%  | TNIPHVTIDAQP  |
| 105 | S1  | 0.0%  | CHSSTWRAC---  |
| 106 | S1  | 25.0% | WPKIQNELPPGR  |
| 107 | S1  | 0.0%  | HPVDAHV-----  |
| 108 | S1  | 0.0%  | QPPRSTS-----  |
| 109 | S1  | 0.0%  | CSEWGPNV---   |
| 110 | S1  | 8.3%  | TTAYPARWGHP   |
| 111 | S1  | 0.0%  | GLAPRSA-----  |
| 112 | S1  | 14.3% | SNYNLPV-----  |
| 113 | S1  | 9.1%  | GKTDPLTSAFL-  |
| 114 | S1  | 0.0%  | ILANDLTAPGPR  |
| 115 | S1  | 20.0% | AWKSPSKLTC--  |
| 116 | S1  | 0.0%  | YPMRAPTSQARH  |
| 117 | S1  | 0.0%  | ATRAHQAPHYPP  |
| 118 | S1  | 0.0%  | TTVQOTV-----  |
| 119 | S1  | 8.3%  | WNRSFAFSGPYL  |
| 120 | S1  | 0.0%  | VSTTTTR-----  |
| 121 | S1  | 0.0%  | LPTATHPMPHHT  |
| 122 | S1  | 0.0%  | CSRFNPDWC---  |
| 123 | S1  | 0.0%  | VSRHQSWHPHDL  |
| 124 | S1  | 0.0%  | LPIAKAL-----  |
| 125 | S1  | 0.0%  | CMNQHSSAC---  |
| 126 | S1  | 0.0%  | HDVKYRLTSVE-  |
| 127 | S1  | 0.0%  | CTMKNGPSC---  |
| 128 | S1  | 11.1% | CERMWRSYC---  |
| 129 | S1  | 0.0%  | YLPLVTPSYDPG  |
| 130 | S1  | 0.0%  | LTNNANTINKSA  |
| 131 | S1  | 14.3% | ANKLTSY-----  |
| 132 | S1  | 0.0%  | TMGFTAPRFPHY  |
| 133 | S1  | 16.7% | TNKDRHTVYPIWA |

|     |    |       |               |
|-----|----|-------|---------------|
| 134 | S1 | 0.0%  | VASPERTSPAFP  |
| 135 | S1 | 0.0%  | THLPWQT-----  |
| 136 | S1 | 0.0%  | GPHMLQNKLR-   |
| 137 | S1 | 0.0%  | AAQTSTP-----  |
| 138 | S1 | 16.7% | SMVYGNLPSAL   |
| 139 | S1 | 25.0% | SLEPWRTTSR    |
| 140 | S1 | 8.3%  | APQLPWSARPAV  |
| 141 | S1 | 8.3%  | SHPWNAORELSV  |
| 142 | S1 | 8.3%  | LLADTTGHRPWT  |
| 143 | S1 | 8.3%  | SNTAAPKPNTTH  |
| 144 | S1 | 0.0%  | MHALNTNAPATW  |
| 145 | S1 | 0.0%  | TLHTGTY-----  |
| 146 | S1 | 0.0%  | AWWWNPPLAY--  |
| 147 | S1 | 0.0%  | AMSTGHNSGPSV  |
| 148 | S1 | 8.3%  | HMLNYKIRSGGP  |
| 149 | S1 | 0.0%  | QPMQTRSTQLAS  |
| 150 | S1 | 0.0%  | WALDRGA-----  |
| 151 | S1 | 8.3%  | VAKHEGVSLRLI  |
| 152 | S1 | 0.0%  | YAYEAMKPTPTP  |
| 153 | S1 | 0.0%  | RAAGSMPTPRLA  |
| 154 | S1 | 0.0%  | TPQNGPSTPMHA  |
| 155 | S1 | 0.0%  | TEQSWIQIYAR   |
| 156 | S1 | 8.3%  | NHTLSQSHPTLG  |
| 157 | S1 | 0.0%  | ANNASPT-----  |
| 158 | S1 | 0.0%  | ATWSHRSSGAL   |
| 159 | S1 | 16.7% | HNTTPL-----   |
| 160 | S1 | 16.7% | SPATRNHMYTQD  |
| 161 | S1 | 0.0%  | CLLNKVGQC---  |
| 162 | S1 | 0.0%  | GPYRTGQAMTAL  |
| 163 | S1 | 11.1% | CSLHPLRHC---  |
| 164 | S1 | 0.0%  | TLSTQSV-----  |
| 165 | S1 | 0.0%  | QLFTSAS-----  |
| 166 | S1 | 14.3% | VYPHPER-----  |
| 167 | S1 | 0.0%  | AETTAPL-----  |
| 168 | S1 | 0.0%  | CSPKSLWSC---  |
| 169 | S1 | 11.1% | CTPQTKHRC---  |
| 170 | S1 | 0.0%  | YGPHMLQNKLR   |
| 171 | S1 | 0.0%  | CKPSDTRLC---  |
| 172 | S1 | 0.0%  | THSPGLNTPGER  |
| 173 | S1 | 0.0%  | DTPTHATNALPA  |
| 174 | S1 | 0.0%  | MQTGAPL-----  |
| 175 | S1 | 0.0%  | GSSNATT-----  |
| 176 | S1 | 0.0%  | CTASHTVTC---  |
| 177 | S1 | 28.6% | HVIYPRH-----  |
| 178 | S1 | 8.3%  | HKAPSPKGDWAP  |
| 179 | S1 | 16.7% | SQWHPRSASYPM  |
| 180 | S1 | 0.0%  | CKSDRTTHC---  |
| 181 | S1 | 0.0%  | CHSAKSAPC---  |
| 182 | S1 | 0.0%  | YASAGMKPSPTP  |
| 183 | S1 | 0.0%  | EHLRMHSGHYFT  |
| 184 | S1 | 20.0% | SHSITSKFSV--  |
| 185 | S1 | 11.1% | CCSCPQLC---   |
| 186 | S1 | 0.0%  | LDDNQDGGHTPT  |
| 187 | S1 | 8.3%  | ANYFLPPVLSSS  |
| 188 | S1 | 8.3%  | ELYTPTTELAPAR |
| 189 | S1 | 0.0%  | GTLYLYSSKQHMS |
| 190 | S1 | 14.3% | AETTPRV-----  |
| 191 | S1 | 9.1%  | LTAETHAVILS-  |
| 192 | S1 | 0.0%  | CLSNNGKHC---  |
| 193 | S1 | 8.3%  | SNPWSAQRELSV  |
| 194 | S1 | 0.0%  | CPNLTSARC---  |
| 195 | S1 | 0.0%  | AQVTVLGSPLPT  |
| 196 | S1 | 0.0%  | APTQGSPLPRML  |
| 197 | S1 | 0.0%  | NPNEREATNTAH  |
| 198 | S1 | 0.0%  | GETPAPM-----  |
| 199 | S1 | 0.0%  | CNHSGLLRC---  |
| 200 | S1 | 8.3%  | VTSPAAPIHSAD  |
| 201 | S1 | 9.1%  | SLPASWRSMPP-  |
| 202 | S1 | 25.0% | STLHPGRPSHP   |

|     |    |       |              |
|-----|----|-------|--------------|
| 203 | S1 | 0.0%  | DCNDRKPTGDG  |
| 204 | S1 | 0.0%  | KNLNTTGMYAAS |
| 205 | S1 | 14.3% | KFIPGTY----- |
| 206 | S1 | 0.0%  | KMPHFTLSKVA  |
| 207 | S1 | 14.3% | TNPQPSL----- |
| 208 | S1 | 0.0%  | AGTGKWQPRG-- |
| 209 | S1 | 16.7% | YTYTSYNSRA   |
| 210 | S1 | 0.0%  | NKVTNGGAAQR- |
| 211 | S1 | 8.3%  | HLQTPQPEHNNL |
| 212 | S1 | 0.0%  | TMDATTPQVTHY |
| 213 | S1 | 0.0%  | GMSRFNLDPTPA |
| 214 | S1 | 16.7% | SYSQHYGIPNPW |
| 215 | S1 | 0.0%  | EGPPLSR----- |
| 216 | S1 | 8.3%  | QPASDYATWPRS |
| 217 | S1 | 0.0%  | ATTHRDVQNAFR |
| 218 | S1 | 0.0%  | YWAATMP----- |
| 219 | S1 | 0.0%  | HHPWRTA----- |
| 220 | S1 | 0.0%  | GLCQSIMRERLS |
| 221 | S1 | 0.0%  | GDRLIVP----- |
| 222 | S1 | 8.3%  | SVSVEVKPIPTP |
| 223 | S1 | 0.0%  | TLPAFGPRAHVL |
| 224 | S1 | 0.0%  | QYLENNRWKVPS |
| 225 | S1 | 0.0%  | QSLHQRL----- |
| 226 | S1 | 14.3% | LTLSPSA----- |
| 227 | S1 | 0.0%  | QSANLLNPAKTM |
| 228 | S1 | 0.0%  | YPMRAPTSQAWH |
| 229 | S1 | 0.0%  | IVPLHLV----- |
| 230 | S1 | 14.3% | WVEVHYL----- |
| 231 | S1 | 14.3% | SHPSSK-----  |
| 232 | S1 | 11.1% | CLTSPMGKC--- |
| 233 | S1 | 14.3% | GRLVPPL----- |
| 234 | S1 | 0.0%  | AITLAP-----  |
| 235 | S1 | 8.3%  | SPNFSWLPLGTT |
| 236 | S1 | 14.3% | VATPAHH----- |
| 237 | S1 | 8.3%  | QVADTTQNTTGT |
| 238 | S1 | 33.3% | SFKPPANHHAWY |
| 239 | S1 | 8.3%  | SDQLLLLSSANW |
| 240 | S1 | 14.3% | APAHPLT----- |
| 241 | S1 | 8.3%  | AMSPRHISGPSV |
| 242 | S1 | 8.3%  | IPLPPSRPFFK  |
| 243 | S1 | 8.3%  | LSTHTTESRSMV |
| 244 | S1 | 8.3%  | KPYNLVSGANQP |
| 245 | S1 | 0.0%  | CNANSMLRC--- |
| 246 | S1 | 0.0%  | CGHKNQFHC--- |
| 247 | S1 | 0.0%  | ALQRISPPQHWM |
| 248 | S1 | 0.0%  | RAPASMPARLA  |
| 249 | S1 | 0.0%  | ANHLNPNASRVL |
| 250 | S1 | 8.3%  | DLNELVLRSLRA |
| 251 | S1 | 0.0%  | TMPNMGP----- |
| 252 | S1 | 0.0%  | AMNPVSP----- |
| 253 | S1 | 0.0%  | WR4PRATDVNLR |
| 254 | S1 | 0.0%  | HEGTRSTASYPK |
| 255 | S1 | 0.0%  | TAPPTWLQTQWA |
| 256 | S1 | 14.3% | AFVSHN-----  |
| 257 | S1 | 0.0%  | CETQAPMNVCP  |
| 258 | S1 | 0.0%  | NNQLSDV----- |
| 259 | S1 | 11.1% | CTCRPNNMC--- |
| 260 | S1 | 11.1% | CSKSYEYNC--- |
| 261 | S1 | 11.1% | CASNLTAYY--- |
| 262 | S1 | 0.0%  | TTHHYGKSGY-  |
| 263 | S1 | 9.1%  | QLSWNNRRFSI- |
| 264 | S1 | 16.7% | QSPVNHVHYHI  |
| 265 | S1 | 9.1%  | LRLTGLRAPYS- |
| 266 | S1 | 0.0%  | RLHSDRALMID- |
| 267 | S1 | 11.1% | CTQMRTAYC--- |
| 268 | S1 | 0.0%  | WPQKAQP----- |
| 269 | S1 | 0.0%  | CLMRFRC----  |
| 270 | S1 | 0.0%  | TEQSWIRILCAW |
| 271 | S1 | 8.3%  | MWPTTTTSSPYH |

|        |       |   |   |   |               |
|--------|-------|---|---|---|---------------|
| 272 S1 | 8.3%  | S | S | S | NSELWPLLSA    |
| 273 S1 | 0.0%  |   |   |   | HYTADKRHAERL  |
| 274 S1 | 0.0%  |   |   |   | YPMRAPTCQAWH  |
| 275 S1 | 11.1% |   |   |   | GLGASYWWR---  |
| 276 S1 | 14.3% |   |   |   | MLFYPRP-----  |
| 277 S1 | 0.0%  |   |   |   | NHHHQPLARNQS  |
| 278 S1 | 0.0%  |   |   |   | ETANLRLQWGHS  |
| 279 S1 | 11.1% |   |   |   | CRSDPPRWC---  |
| 280 S1 | 14.3% | S |   |   | PTSKVP-----   |
| 281 S1 | 0.0%  |   |   |   | AWLTGPRALGPL  |
| 282 S1 | 0.0%  |   |   |   | CWTSAHAPC---  |
| 283 S1 | 0.0%  |   |   |   | CSGKWQPRC---  |
| 284 S1 | 0.0%  |   |   |   | CYQKMNPQC---  |
| 285 S1 | 0.0%  |   |   |   | CTSKTISAC---  |
| 286 S1 | 14.3% | S |   |   | PFRAPT-----   |
| 287 S1 | 8.3%  | S |   |   | CSYCLKSSTDL   |
| 288 S1 | 0.0%  |   |   |   | YPPRAWDTPHPH  |
| 289 S1 | 0.0%  |   |   |   | CYYAHDATC---  |
| 290 S1 | 0.0%  |   |   |   | ARYHTHM-----  |
| 291 S1 | 0.0%  |   |   |   | AWNTHGWASVTS  |
| 292 S1 | 8.3%  | S |   |   | PVWRSTTNGEA   |
| 293 S1 | 0.0%  |   |   |   | GITPSMAPGQRP  |
| 294 S1 | 14.3% |   |   |   | LTPVPGQ-----  |
| 295 S1 | 8.3%  |   |   |   | AWRPYQNADYTF  |
| 296 S1 | 8.3%  |   |   |   | QHYNIVNTQSRV  |
| 297 S1 | 0.0%  |   |   |   | CINWARSAC---  |
| 298 S1 | 0.0%  |   |   |   | GSPGQORAHNST  |
| 299 S1 | 16.7% |   |   |   | QTQALYHSRQVH  |
| 300 S1 | 0.0%  |   |   |   | HTNTKPL-----  |
| 301 S1 | 0.0%  |   |   |   | QALSWR-----   |
| 302 S1 | 0.0%  |   |   |   | TPSWTSRPMAMP  |
| 303 S1 | 0.0%  |   |   |   | TSFQNL-----   |
| 304 S1 | 0.0%  |   |   |   | EHPTWIAPAAPT  |
| 305 S1 | 14.3% |   |   |   | IPTLPSS-----  |
| 306 S1 | 0.0%  |   |   |   | HQITQPRSLLS   |
| 307 S1 | 0.0%  |   |   |   | DETRAPL-----  |
| 308 S1 | 0.0%  |   |   |   | AGDTTHGIPC--  |
| 309 S1 | 0.0%  |   |   |   | KQLTSPPQLNPV  |
| 310 S1 | 0.0%  |   |   |   | RSPEQORMHNST  |
| 311 S1 | 0.0%  |   |   |   | TMNMQPMAAGPG  |
| 312 S1 | 14.3% | S |   |   | YTTSLK-----   |
| 313 S1 | 0.0%  |   |   |   | KVITIWQ-----  |
| 314 S1 | 0.0%  |   |   |   | GLQARHI-----  |
| 315 S1 | 14.3% |   |   |   | MPKYYLQ-----  |
| 316 S1 | 16.7% |   |   |   | WHISPLTHTSLV  |
| 317 S1 | 0.0%  |   |   |   | CDSHKRLK---   |
| 318 S1 | 0.0%  |   |   |   | TEQHW1KNIYAR  |
| 319 S1 | 14.3% |   |   |   | DGTTGLR-----  |
| 320 S1 | 8.3%  |   |   |   | TKTYPPRGAQS   |
| 321 S1 | 28.6% |   |   |   | AAPRPYR-----  |
| 322 S1 | 8.3%  |   |   |   | TPIGNKSPKSHA  |
| 323 S1 | 0.0%  |   |   |   | NATLQSWVRDAR  |
| 324 S1 | 14.3% |   |   |   | NQDVPLF-----  |
| 325 S1 | 14.3% | S |   |   | APLASF-----   |
| 326 S1 | 0.0%  |   |   |   | EANSLAPLAPIW  |
| 327 S1 | 14.3% |   |   |   | HAIYPRQ-----  |
| 328 S1 | 8.3%  |   |   |   | LPSQMYLGPDRS  |
| 329 S1 | 11.1% |   |   |   | CQKQHPSSC---  |
| 330 S1 | 0.0%  |   |   |   | CWTRTVAC---   |
| 331 S1 | 0.0%  |   |   |   | GSHDWKR-----  |
| 332 S1 | 16.7% |   |   |   | AWKPOPSQFSAS  |
| 333 S1 | 8.3%  |   |   |   | QPELPTRLRLSL  |
| 334 S1 | 0.0%  |   |   |   | CMSTMMRSC---  |
| 335 S1 | 11.1% |   |   |   | CVKQSHAGTC--- |
| 336 S1 | 8.3%  |   |   |   | ALPNPPWTSHTA  |
| 337 S1 | 0.0%  |   |   |   | NMHKELT-----  |
| 338 S1 | 8.3%  |   |   |   | AWPPPSMGPLAY  |
| 339 S1 | 0.0%  |   |   |   | THPLHTNLPPTS  |
| 340 S1 | 0.0%  |   |   |   | TKNMLSLPVC    |

|     |    |       |                                                                   |
|-----|----|-------|-------------------------------------------------------------------|
| 341 | S1 | 0.0%  | HSGNIHQPLRSM                                                      |
| 342 | S1 | 0.0%  | GWSSYRG-----                                                      |
| 343 | S1 | 9.1%  | SVCGMKPSRP-                                                       |
| 344 | S1 | 8.3%  | LLPDRNNAYS <sup>S</sup> DT                                        |
| 345 | S1 | 8.3%  | YYPASSTIQ <sup>S</sup> RP                                         |
| 346 | S1 | 9.1%  | NLT <sup>L</sup> ASYPSW-                                          |
| 347 | S1 | 8.3%  | TIPRITTTPT <sup>S</sup> WV                                        |
| 348 | S1 | 0.0%  | HPSLHALQGDHV                                                      |
| 349 | S1 | 42.9% | T <sup>F</sup> I <sup>N</sup> P <sup>S</sup> H-----               |
| 350 | S1 | 0.0%  | HGLPVTTRGAFG                                                      |
| 351 | S1 | 0.0%  | WPSSYLSPIPYS                                                      |
| 352 | S1 | 8.3%  | HIWSRPMFY <sup>S</sup> PA                                         |
| 353 | S1 | 0.0%  | CSCSNTKWC---                                                      |
| 354 | S1 | 0.0%  | TWPHSIG-----                                                      |
| 355 | S1 | 8.3%  | S <sup>S</sup> GMSAPYTTVTA                                        |
| 356 | S1 | 0.0%  | HWDPFSL SAYFP                                                     |
| 357 | S1 | 0.0%  | HHLRTDMRWAT                                                       |
| 358 | S1 | 8.3%  | TPLG <sup>P</sup> I <sup>L</sup> R <sup>N</sup> A <sup>H</sup> S  |
| 359 | S1 | 8.3%  | YYPAGSTIQ <sup>S</sup> RP                                         |
| 360 | S1 | 0.0%  | LPPWKHKTS <sup>G</sup> V <sup>A</sup>                             |
| 361 | S1 | 16.7% | DM <sup>K</sup> STIPAPT <sup>G</sup> G                            |
| 362 | S1 | 0.0%  | TLNMHKLHLPDS                                                      |
| 363 | S1 | 0.0%  | CPSTLRAQC---                                                      |
| 364 | S1 | 0.0%  | AETRAPL-----                                                      |
| 365 | S1 | 0.0%  | ADYRSSVGGGK-                                                      |
| 366 | S1 | 0.0%  | MPTMASS-----                                                      |
| 367 | S1 | 8.3%  | HNMV <sup>P</sup> SLLSTSK                                         |
| 368 | S1 | 0.0%  | EETSAPL-----                                                      |
| 369 | S1 | 0.0%  | DMVQTSTRRLAL                                                      |
| 370 | S1 | 0.0%  | CTNNHANIC---                                                      |
| 371 | S1 | 25.0% | S <sup>S</sup> DT <sup>L</sup> SR <sup>L</sup> HV <sup>S</sup> MT |
| 372 | S1 | 0.0%  | HSIHSALTALAG                                                      |
| 373 | S1 | 8.3%  | HLFPQSN <sup>V</sup> GGHS                                         |
| 374 | S1 | 0.0%  | FGNSDKLQTRAF                                                      |
| 375 | S1 | 14.3% | RPLP <sup>P</sup> TP-----                                         |
| 376 | S1 | 0.0%  | APT <sup>P</sup> RVAPLPV <sup>G</sup>                             |
| 377 | S1 | 8.3%  | S <sup>S</sup> WPLYSRDSGL <sup>G</sup>                            |
| 378 | S1 | 0.0%  | MPLQRTL-----                                                      |
| 379 | S1 | 0.0%  | WTVQTPTMLPMM                                                      |
| 380 | S1 | 0.0%  | CIRMDGQKC---                                                      |
| 381 | S1 | 0.0%  | VRDSVTVNSRHS                                                      |
| 382 | S1 | 14.3% | S <sup>S</sup> PFRAPP-----                                        |
| 383 | S1 | 8.3%  | APPTSRQAGD <sup>G</sup> V                                         |
| 384 | S1 | 14.3% | LPSAPRP-----                                                      |
| 385 | S1 | 0.0%  | YWAQSSNGAARL                                                      |
| 386 | S1 | 28.6% | VY <sup>K</sup> PPGG-----                                         |
| 387 | S1 | 0.0%  | TNTSWMTAMTPF                                                      |
| 388 | S1 | 8.3%  | ARQQTATT <sup>C</sup> G <sup>C</sup>                              |
| 389 | S1 | 0.0%  | QPRPTSI-----                                                      |
| 390 | S1 | 0.0%  | TSSKAMS-----                                                      |
| 391 | S1 | 28.6% | WPTL <sup>P</sup> YT-----                                         |
| 392 | S1 | 10.0% | DC <sup>K</sup> PTTPTHC--                                         |
| 393 | S1 | 16.7% | DAAD <sup>P</sup> PHVLT <sup>L</sup> T                            |
| 394 | S1 | 16.7% | A <sup>F</sup> AT <sup>S</sup> Y <sup>N</sup> LHDT                |
| 395 | S1 | 0.0%  | GGLLAV-----                                                       |
| 396 | S1 | 0.0%  | CLTDVGRAC---                                                      |
| 397 | S1 | 8.3%  | AQAKYWS <sup>V</sup> TKTT                                         |
| 398 | S1 | 8.3%  | HPNQADLPPG <sup>G</sup> L                                         |
| 399 | S1 | 0.0%  | RALMDMPAHRHA                                                      |
| 400 | S1 | 0.0%  | TSVTMSSNEAWM                                                      |
| 401 | S1 | 0.0%  | CYALKPPEC---                                                      |
| 402 | S1 | 0.0%  | QLSGMLEWQ <sup>N</sup> L <sup>R</sup>                             |
| 403 | S1 | 0.0%  | CPDPTTRLC---                                                      |
| 404 | S1 | 0.0%  | LPRDLHATPQ <sup>Q</sup> I                                         |
| 405 | S1 | 0.0%  | CDLPTS <sup>R</sup> IC---                                         |
| 406 | S1 | 16.7% | YHNP <sup>P</sup> YYQGAHD                                         |
| 407 | S1 | 0.0%  | CLLDDL <sup>R</sup> KC---                                         |
| 408 | S1 | 0.0%  | AIPSVP-----                                                       |
| 409 | S1 | 0.0%  | KIIPETY-----                                                      |

|     |    |       |               |
|-----|----|-------|---------------|
| 410 | S1 | 0.0%  | TTMFSTQSQKVP  |
| 411 | S1 | 8.3%  | MNDHKTPNSLR   |
| 412 | S1 | 0.0%  | VPPLLPL-----  |
| 413 | S1 | 8.3%  | ELKLTSAHAHTR  |
| 414 | S1 | 25.0% | FMKSPIPAPPGG  |
| 415 | S1 | 0.0%  | APIHLHSEPLLH  |
| 416 | S1 | 11.1% | CYGSTHQC---   |
| 417 | S1 | 0.0%  | EPHRTTW-----  |
| 418 | S1 | 0.0%  | GNTPSRA-----  |
| 419 | S1 | 0.0%  | HPPTHNTAPWHA  |
| 420 | S1 | 14.3% | HDTYTAH-----  |
| 421 | S1 | 8.3%  | TVSINLPTSTMR  |
| 422 | S1 | 0.0%  | HSTKANSMLTIA  |
| 423 | S1 | 0.0%  | DGTRAQDAGGRP  |
| 424 | S1 | 0.0%  | YTPQKKIERAFG  |
| 425 | S1 | 0.0%  | NPFNQHLHAQHP  |
| 426 | S1 | 8.3%  | DHSSSTCRASAG  |
| 427 | S1 | 8.3%  | HPHQASGWTSP   |
| 428 | S1 | 8.3%  | WPTNAAHSLYRL  |
| 429 | S1 | 8.3%  | SDSAGMKPSPTP  |
| 430 | S1 | 0.0%  | GGVDAEW-----  |
| 431 | S1 | 8.3%  | YERPLHRLSID   |
| 432 | S1 | 8.3%  | SSDNHLAQLHT   |
| 433 | S1 | 0.0%  | TYAQLPI-----  |
| 434 | S1 | 0.0%  | DSGYHRAPRPWP  |
| 435 | S1 | 0.0%  | HDEGRRG-----  |
| 436 | S1 | 8.3%  | SAHGTSTGVPWP  |
| 437 | S1 | 0.0%  | ALHSARE-----  |
| 438 | S1 | 0.0%  | MDNQDGMNACAG  |
| 439 | S1 | 0.0%  | RPSSYMYAIPYR  |
| 440 | S1 | 14.3% | STMPKFN-----  |
| 441 | S1 | 16.7% | TVKAGWPVEDVP  |
| 442 | S1 | 16.7% | SHALPMTWSTAA  |
| 443 | S1 | 8.3%  | AADYRSSVGGGK  |
| 444 | S1 | 0.0%  | VLPWYSP-----  |
| 445 | S1 | 11.1% | CTDGPESSEC--- |
| 446 | S1 | 8.3%  | QRLIQDSVALWP  |
| 447 | S1 | 0.0%  | AGPLQPS-----  |
| 448 | S1 | 16.7% | SMVYGNRLPSAL  |
| 449 | S1 | 14.3% | WPLGDYF-----  |
| 450 | S1 | 0.0%  | CKHFRTMSC---  |
| 451 | S1 | 0.0%  | HQITQPTSLLS   |
| 452 | S1 | 0.0%  | TKTAASF-----  |
| 453 | S1 | 0.0%  | GETRAPV-----  |
| 454 | S1 | 0.0%  | DARHQSWHPHDL  |
| 455 | S1 | 0.0%  | LQPGHSVHNF    |
| 456 | S1 | 0.0%  | CMWLSQRAC---  |
| 457 | S1 | 0.0%  | GGSLVAKATAPN  |
| 458 | S1 | 0.0%  | CPGVHRSTC---  |
| 459 | S1 | 11.1% | CFLPDGVRC---  |
| 460 | S1 | 8.3%  | LPVSKSVTQSH   |
| 461 | S1 | 0.0%  | NRAATMP-----  |
| 462 | S1 | 0.0%  | QPHLTNPGPRHL  |
| 463 | S1 | 0.0%  | MDAKNPLGPTTY  |
| 464 | S1 | 0.0%  | YVSAGMKPSP--  |
| 465 | S1 | 0.0%  | KLQTYNPHFRNP  |
| 466 | S1 | 8.3%  | SGLPHLSLNAPR  |
| 467 | S1 | 0.0%  | MHRSDLMSAAVR  |
| 468 | S1 | 0.0%  | DLIKYPPVTAWS  |
| 469 | S1 | 14.3% | STYTNRA-----  |
| 470 | S1 | 8.3%  | HGHPYQHLRLVL  |
| 471 | S1 | 16.7% | VPAWPAHQKLAK  |
| 472 | S1 | 16.7% | STWSHHLSSAGL  |
| 473 | S1 | 0.0%  | CTHSKSSQC---  |
| 474 | S1 | 8.3%  | QGYRPIILPSHFL |
| 475 | S1 | 8.3%  | VPPIINAVQVPFP |
| 476 | S1 | 8.3%  | WTSKDVSILSPA  |
| 477 | S1 | 25.0% | TPHKPLTSSSGP  |
| 478 | S1 | 16.7% | TPAAPYATFGAP  |

|         |       |               |
|---------|-------|---------------|
| 479 S1  | 0.0%  | ESLHQRL-----  |
| 480 S1  | 0.0%  | IDNHMQL-----  |
| 481 S1  | 11.1% | CLDKPRFLC---  |
| 482 S1  | 11.1% | CNMNRYNTC---  |
| 483 S1  | 11.1% | CSSQYRPHYC--- |
| 484 S1  | 8.3%  | APRLPQSLLPQL  |
| 485 S1  | 14.3% | TRVQLLH-----  |
| 486 S1  | 14.3% | MPMVPK-----   |
| 487 S1  | 8.3%  | TPGNSFLDHMKQ  |
| 488 S1  | 8.3%  | GLPKNMFWDASS  |
| 489 S1  | 8.3%  | TTAAVDMPRSTP  |
| 490 S1  | 0.0%  | GLQGRHI-----  |
| 491 S1  | 14.3% | YLTMPPT-----  |
| 492 S1  | 11.1% | CQHGRSSYC---  |
| 493 S1  | 0.0%  | TOYFYLP-----  |
| 494 S1  | 14.3% | TELNLSV-----  |
| 495 S1  | 8.3%  | STSKTLTDLFSY  |
| 496 S1  | 0.0%  | AQDVTKNGLRW   |
| 497 S1  | 8.3%  | ATGHPVWHWHSS  |
| 498 S1  | 0.0%  | GETHAPL-----  |
| 499 S1  | 0.0%  | GMWFSGL-----  |
| 500 S1  | 0.0%  | LIAHSMPPRTRI  |
| 501 S1  | 0.0%  | GGTRAPL-----  |
| 502 S1  | 8.3%  | SPAANGPQPRPL  |
| 503 S1  | 8.3%  | NAHLHITPRSTL  |
| 504 S1  | 0.0%  | NPSSKQILSQVP  |
| 505 S1  | 0.0%  | KVLHSDRALMID  |
| 506 S1  | 0.0%  | CPLSSHPGC---  |
| 507 S1  | 8.3%  | QPSKHISEARGF  |
| 508 S1  | 25.0% | SKIQVSPATVP   |
| 509 S1  | 0.0%  | ADWHRTSTSPMS  |
| 510 S1  | 0.0%  | EYSLYRILHMDE  |
| 511 S1  | 8.3%  | GDTNPNPGKRSQI |
| 512 S1  | 0.0%  | ALQHQRAFQHR   |
| 513 S1  | 0.0%  | HPMADHR-----  |
| 514 S1  | 0.0%  | TQANAFSPAPRV  |
| 515 S1  | 0.0%  | GITSAAT-----  |
| 516 S1  | 11.1% | CQSVPSDRC---  |
| 517 S1  | 0.0%  | QAHLEKTAVPRM  |
| 518 S1  | 8.3%  | HATPQKPLHSRM  |
| 519 S1  | 11.1% | CLSLKYQSC---  |
| 520 S1  | 0.0%  | YPTRAPTSQAWH  |
| 521 S1  | 0.0%  | WETRAPL-----  |
| 522 S1  | 0.0%  | NEHKDARSPHSP  |
| 523 S1  | 0.0%  | ITMPWHDTERSH  |
| 524 S1  | 0.0%  | AKHVTAPHIREV  |
| 525 S1  | 0.0%  | CNLLLRTPC---  |
| 526 S1  | 0.0%  | GTLQLHNTHNST  |
| 527 S1  | 0.0%  | CHWPMSASC---  |
| 528 S1  | 0.0%  | QDALLAAPVISK  |
| 529 S1  | 8.3%  | YHMPPSATPLTA  |
| 530 S1  | 0.0%  | CHSGRSEHC---  |
| 531 S1  | 8.3%  | WLKDSRAAWIRH  |
| 532 S1  | 8.3%  | AILRPOLMPGSS  |
| 533 S1  | 22.2% | CGRINYGTC---  |
| 534 S1  | 0.0%  | GSPRTP-----   |
| 535 S1  | 8.3%  | SHSLALLDSVAS  |
| 536 S1  | 0.0%  | CTQAFLPFC---  |
| 537 S1  | 0.0%  | CLPMNNALC---  |
| 538 S1  | 0.0%  | LDYHQAWGHTRA  |
| 539 S1  | 0.0%  | FGIHAKYPSPIY  |
| 540 S1  | 0.0%  | IPNDLNPRQLRG  |
| 541 S1  | 8.3%  | DQRDYHYGRGT   |
| 542 S1  | 0.0%  | CLSNNIVKHC--  |
| 543 S1  | 0.0%  | NMFGSLTSHVTA  |
| 544 S1  | 8.3%  | YWPRPDDSFWRP  |
| 545 S1  | 22.2% | CTKTQLHVC---  |
| 546 S1  | 0.0%  | MNVLSSSASTES  |
| 547 S11 | 0.0%  | CELRGDGWC---  |



|     |                |       |              |
|-----|----------------|-------|--------------|
| 548 | S12            | 9.1%  | GCHSSTWRACG- |
| 549 | S13            | 18.2% | GCPTPHSGTCG- |
| 550 | S14            | 9.1%  | GCMNQHSSACG- |
| 551 | S15            | 9.1%  | GCDSHKRLKCG- |
| 552 | S16            | 11.1% | CPDLHHHMC--- |
| 553 | S17            | 0.0%  | CLGQHAFTC--- |
| 554 | S18            | 25.0% | SNTAPHC---   |
| 555 | S19            | 11.1% | CHVLPNGNC--- |
| 556 | S20            | 0.0%  | CKPQYPLSC--- |
| 557 | S21            | 0.0%  | CQTARTPAC--- |
| 558 | S22            | 0.0%  | CNQSQPKHC--- |
| 559 | S23            | 0.0%  | CTPSKISVC--- |
| 560 | S24            | 0.0%  | CVSPGPRLC--- |
| 561 | S25            | 0.0%  | CYALSGVPC--- |
| 562 | S26            | 11.1% | CKHPDPQFC--- |
| 563 | S27            | 0.0%  | CHQSKPLLC--- |
| 564 | S28            | 0.0%  | CPGPFSNWC--- |
| 565 | S29            | 0.0%  | CPHKTHLPC--- |
| 566 | S30            | 22.2% | CVFPLSHYC--- |
| 567 | S31            | 11.1% | CNNIAPSSC--- |
| 568 | S32            | 0.0%  | CTLGMQFQC--- |
| 569 | S33            | 0.0%  | CTNPTGMLC--- |
| 570 | S34            | 0.0%  | CSNMAPRSC--- |
| 571 | S35            | 11.1% | CSMAPNMSC--- |
| 572 | S36            | 0.0%  | CSDLTMEAC--- |
| 573 | S37            | 0.0%  | CPWPYKYSC--- |
| 574 | S38            | 22.2% | FGGNFHRC---  |
| 575 | S39            | 0.0%  | CLTTSQQTC--- |
| 576 | S40            | 0.0%  | CTANSGSFC--- |
| 577 | S14            | 0.0%  | CQEPLDESC--- |
| 578 | S42            | 0.0%  | CQMSMFARC--- |
| 579 | S43            | 22.2% | CPLTPKAYC--- |
| 580 | S44            | 0.0%  | CNNSHTALC--- |
| 581 | S45            | 0.0%  | CLSSDITLC--- |
| 582 | S46            | 11.1% | CLTHGPKYC--- |
| 583 | S47            | 0.0%  | CLGKDLRTC--- |
| 584 | S48            | 0.0%  | CAPKTHPLC--- |
| 585 | S49            | 11.1% | CPTGLMKYC--- |
| 586 | S50            | 0.0%  | CTWKAPLQC--- |
| 587 | S51            | 11.1% | CSHTLGPSC--- |
| 588 | S52            | 0.0%  | CLSTSQYSC--- |
| 589 | S53            | 0.0%  | CGNSNPKSC--- |
| 590 | S54            | 0.0%  | YCPRYVRRKLEN |
| 591 | S55            | 8.3%  | NGYEIEWYSWVT |
| 592 | S56            | 8.3%  | CNGYEIEWYSWV |
| 593 | S57            | 14.3% | YLTMPDP----  |
| 594 | S58            | 28.6% | WPTPPYA----- |
| 595 | S59            | 0.0%  | TPHNTVS----- |
| 596 | S60            | 14.3% | SLPAHAR----- |
| 597 | S61            | 0.0%  | HSSLQTP----- |
| 598 | S62            | 0.0%  | YSIPKSS----- |
| 599 | S63            | 14.3% | ALQPRYL----- |
| 600 | S64            | 0.0%  | GREVD-----   |
|     | consensus/100% |       | .....        |
|     | consensus/90%  |       | .....        |
|     | consensus/80%  |       | t.....       |
|     | consensus/70%  |       | t.....       |
