# Supplementary material for: Novel peptides for small-caliber graft functionalization selected by a phage display of endothelial-positive/platelet-negative combined selection
Source: Royal Society of Chemistry journal article supplement (doi:10.1039/c7tb02652h), 2017-01-01
Supplement: c7tb02652h2.pdf [file c7tb02652h2.pdf]

# MView

[Tools \(/Tools/\)](#) > [Multiple Sequence Alignment \(/Tools/msa\)](#) > MView

## Results for job mview-I20170914-024003-0501-74904496-oy

Reference sequence (1): S0

Identities normalised by aligned length.

Colored by: identity + property

```
1 [ . ] 12
1 S0      100.0%  TIPRAPSPANTY
2 S1      0.0%    HGGVRLY-----
3 S2      0.0%    GQSEKHL-----
4 S3      0.0%    SLSKWSF-----
5 S4      14.3%   KIAVIST-----
6 S5      28.6%   TDNTKPK-----
7 S6      28.6%   TNWRTIN-----
8 S7      14.3%   VSRDTPQ-----
9 S8      0.0%    SFKIPYHYDSGQ
10 S9     8.3%    NRPDSAQFWLHH
11 S10    0.0%    DSSNPIFWRPSS
12 S11    0.0%    FYRHDTYNTHHT
13 S12    8.3%    HTKQIPRHIYSA
14 S13    0.0%    HAIYPRH-----
15 S14    0.0%    LNHHLGF-----
16 S15    0.0%    CQLLSARSC---
17 S16    0.0%    SVFLPTRHSPDL
18 S17    0.0%    ATTHRDVQNAFR
19 S18    0.0%    QTNDTSRQPSYR
20 S19    14.3%   AALSMPP-----
21 S20    0.0%    HYQHNTHHPSRW
22 S21    0.0%    SHHIPSQWPLH
23 S22    0.0%    SVQLQQQ-----
24 S23    8.3%    LVSKPYSLTKGI
25 S24    8.3%    QTAGKFNSAAHP
26 S25    0.0%    HSMPYGLVSGSK
27 S26    28.6%   THHTLFS-----
28 S27    0.0%    QPWPTSI-----
29 S28    14.3%   TPTLIKG-----
30 S29    8.3%    TTVYPARWGAHP
31 S30    0.0%    CNNQMLERC---
32 S31    0.0%    GTTTWLY-----
33 S32    14.3%   LAHNRTS-----
34 S33    0.0%    ETALIAA-----
35 S34    14.3%   LPVRLDW-----
36 S35    8.3%    SWMPHPRWSPQH
37 S36    8.3%    VNTGMSRLTYM
38 S37    8.3%    SSYYPQLTAHRF
39 S38    0.0%    HTSSSVKMSDVL
40 S39    0.0%    DVQEKGHVDVLR
```

|     |     |       |              |
|-----|-----|-------|--------------|
| 41  | S40 | 0.0%  | YPATHYL----- |
| 42  | S41 | 0.0%  | SLHSKAYERPLS |
| 43  | S42 | 14.3% | QLPHTVL----- |
| 44  | S43 | 28.6% | ETPLQKS----- |
| 45  | S44 | 0.0%  | LARDVQI----- |
| 46  | S45 | 14.3% | KLPVLYA----- |
| 47  | S46 | 14.3% | VNPHYLQ----- |
| 48  | S47 | 0.0%  | QHYNIVNTQSRV |
| 49  | S48 | 0.0%  | LPIVKAL----- |
| 50  | S49 | 0.0%  | QSHYRHISPAQV |
| 51  | S50 | 0.0%  | DLNYFTLSSKRE |
| 52  | S51 | 11.1% | CYQLNTSQC--- |
| 53  | S52 | 0.0%  | GSELYGL----- |
| 54  | S53 | 14.3% | QLWAPPW----- |
| 55  | S54 | 8.3%  | YIGSQTNERYS  |
| 56  | S55 | 16.7% | FHVNPTSPHPL  |
| 57  | S56 | 8.3%  | RADALNSHLSSP |
| 58  | S57 | 8.3%  | LPPEELHRSRL  |
| 59  | S58 | 0.0%  | KNLNTTAMYAAS |
| 60  | S59 | 0.0%  | NYHLTHPHILKT |
| 61  | S60 | 0.0%  | FAIPLVP----- |
| 62  | S61 | 8.3%  | SVSVGMKPSRP  |
| 63  | S62 | 16.7% | GQSPHSYQPTY  |
| 64  | S63 | 16.7% | AQPNWTSLRSLP |
| 65  | S64 | 0.0%  | LPTPGYH----- |
| 66  | S65 | 8.3%  | HYISPAWPTPPA |
| 67  | S66 | 8.3%  | QHANHQAANNLR |
| 68  | S67 | 28.6% | TLPHTRL----- |
| 69  | S68 | 0.0%  | GSLNESWLSKSF |
| 70  | S69 | 0.0%  | YHKPPSPTPLPA |
| 71  | S70 | 14.3% | HSITKPL----- |
| 72  | S71 | 42.9% | GETRAPL----- |
| 73  | S72 | 8.3%  | MPAVMSSAQVPR |
| 74  | S73 | 8.3%  | APIHLHSKPLLH |
| 75  | S74 | 8.3%  | ERSWTLDSALSM |
| 76  | S75 | 0.0%  | IPLVP-----   |
| 77  | S76 | 0.0%  | STGKPYMMLTGV |
| 78  | S77 | 0.0%  | GSHNPHL----- |
| 79  | S78 | 8.3%  | AKALYSANAPAV |
| 80  | S79 | 14.3% | NHWASPR----- |
| 81  | S80 | 16.7% | WSPGQQLHNST  |
| 82  | S81 | 28.6% | TTGQAWR----- |
| 83  | S82 | 0.0%  | KPLNMTLWPHPI |
| 84  | S83 | 16.7% | LIPGYSTSQLS  |
| 85  | S84 | 0.0%  | STASYTR----- |
| 86  | S85 | 8.3%  | MPAVMSSVQVPR |
| 87  | S86 | 14.3% | ALLTGPR----- |
| 88  | S87 | 0.0%  | HHEPGAWLPLSP |
| 89  | S88 | 11.1% | CVARGAQTC--- |
| 90  | S89 | 8.3%  | ATGTNPPGSALS |
| 91  | S90 | 14.3% | ALHSARV----- |
| 92  | S1  | 0.0%  | GPLWSSN----- |
| 93  | S1  | 14.3% | SNQWYAS----- |
| 94  | S1  | 8.3%  | WAPGSMPTSR   |
| 95  | S1  | 8.3%  | DLQSGPMLYWAN |
| 96  | S1  | 0.0%  | FPLLPGPHLSPQ |
| 97  | S1  | 8.3%  | QPPSINLTLYPM |
| 98  | S1  | 0.0%  | CPTPHSGTC--- |
| 99  | S1  | 0.0%  | AMNPRNHSDPSV |
| 100 | S1  | 0.0%  | SVLPSMRLYTQP |
| 101 | S1  | 0.0%  | SNALDPSRYP-  |
| 102 | S1  | 8.3%  | HKAPSPKFDWVP |
| 103 | S1  | 11.1% | CHHAWPRGC--- |
| 104 | S1  | 8.3%  | TNIPHVTIDAQP |
| 105 | S1  | 0.0%  | CHSSTWRAC--- |
| 106 | S1  | 0.0%  | WPKIQNELPPGR |
| 107 | S1  | 14.3% | HPVDAHV----- |
| 108 | S1  | 42.9% | QPPRSTS----- |
| 109 | S1  | 11.1% | CSEWGPNVG--- |
| 110 | S1  | 8.3%  | TTAYPARWGAHP |
| 111 | S1  | 0.0%  | GLAPRSA----- |
| 112 | S1  | 14.3% | SNYNLPV----- |
| 113 | S1  | 9.1%  | GKTDPLTSAFL- |
| 114 | S1  | 0.0%  | ILANDLTAPGPR |
| 115 | S1  | 0.0%  | AWKSPSKLTC-- |
| 116 | S1  | 25.0% | YPMRAPTSQARH |
| 117 | S1  | 8.3%  | ATRAHQAPHYPP |

|        |       |              |
|--------|-------|--------------|
| 118 S1 | 14.3% | TTVQQTV----- |
| 119 S1 | 0.0%  | WNRSPAFSGPYL |
| 120 S1 | 0.0%  | VSTTTTR----- |
| 121 S1 | 0.0%  | LPTATHMPHHT  |
| 122 S1 | 11.1% | CSRFNPDWC--- |
| 123 S1 | 0.0%  | VSRHQSWHPHDL |
| 124 S1 | 0.0%  | LPIAKAL----- |
| 125 S1 | 11.1% | CMNQHSSAC--- |
| 126 S1 | 0.0%  | HDVKYRLTSVE- |
| 127 S1 | 0.0%  | CTMKNGPSC--- |
| 128 S1 | 11.1% | CERMWRSYC--- |
| 129 S1 | 8.3%  | YLPLVTPSYDPG |
| 130 S1 | 8.3%  | LTNNANTINKSA |
| 131 S1 | 0.0%  | ANKLTSY----- |
| 132 S1 | 16.7% | TMGFTAPRFPHY |
| 133 S1 | 8.3%  | TNKDRHTYPYWA |
| 134 S1 | 0.0%  | VASPERTSPAFP |
| 135 S1 | 14.3% | THLPWQT----- |
| 136 S1 | 0.0%  | GPHMLQNKLR-  |
| 137 S1 | 0.0%  | AAQTSTP----- |
| 138 S1 | 8.3%  | SMVYGNSLPSAL |
| 139 S1 | 0.0%  | SSLEPWHRTTSR |
| 140 S1 | 8.3%  | APQLPWSARPAV |
| 141 S1 | 8.3%  | SHPWNAQRELSV |
| 142 S1 | 0.0%  | LLADTTHHRPWT |
| 143 S1 | 33.3% | SNTAAPKPNTTH |
| 144 S1 | 8.3%  | MHALNTNAPATW |
| 145 S1 | 14.3% | TLHTGTY----- |
| 146 S1 | 20.0% | AWWWNPPLAY-- |
| 147 S1 | 0.0%  | AMSTGHNSGPSV |
| 148 S1 | 0.0%  | HMLNYKIRSGGP |
| 149 S1 | 8.3%  | QPMQTRSTQLAS |
| 150 S1 | 0.0%  | WALDRGA----- |
| 151 S1 | 0.0%  | VAKHEGVSLMRI |
| 152 S1 | 25.0% | YAYEAMKPTPTP |
| 153 S1 | 0.0%  | RAAGSMPTPRLA |
| 154 S1 | 25.0% | TPQNGPSTPMHA |
| 155 S1 | 8.3%  | TEQSWIQIYAR  |
| 156 S1 | 8.3%  | NHTISQSHPTLG |
| 157 S1 | 14.3% | ANNASPT----- |
| 158 S1 | 0.0%  | ATWSHHRSSGAL |
| 159 S1 | 0.0%  | HNTTPL-----  |
| 160 S1 | 0.0%  | SPATRNHMYTQD |
| 161 S1 | 0.0%  | CLLNKVGQC--- |
| 162 S1 | 8.3%  | GPYRTGQAMTAL |
| 163 S1 | 0.0%  | CSLHPLRHC--- |
| 164 S1 | 14.3% | TLSTQSV----- |
| 165 S1 | 14.3% | QLFTSAS----- |
| 166 S1 | 14.3% | VYPHPER----- |
| 167 S1 | 28.6% | AETTAPL----- |
| 168 S1 | 11.1% | CSPKSLWSC--- |
| 169 S1 | 11.1% | CTPQTKHRC--- |
| 170 S1 | 8.3%  | YGPHMLQNKLR  |
| 171 S1 | 11.1% | CKPSDTRLC--- |
| 172 S1 | 8.3%  | THSPGLNTPGER |
| 173 S1 | 16.7% | DTPHATNALPA  |
| 174 S1 | 28.6% | MQTGAPL----- |
| 175 S1 | 14.3% | GSSNATT----- |
| 176 S1 | 0.0%  | CTASHTVTC--- |
| 177 S1 | 0.0%  | HVIYPRH----- |
| 178 S1 | 8.3%  | HKAPSPKGDWAP |
| 179 S1 | 8.3%  | SQWHPRSASYPM |
| 180 S1 | 0.0%  | CKSDRTTHC--- |
| 181 S1 | 11.1% | CHSAKSAPC--- |
| 182 S1 | 16.7% | YASAGMKPSPTP |
| 183 S1 | 16.7% | EHLRMHSGHYFT |
| 184 S1 | 0.0%  | SHSITSKFSV-- |
| 185 S1 | 0.0%  | CCSCPQLC---  |
| 186 S1 | 0.0%  | LDDNQDGGHTPT |
| 187 S1 | 8.3%  | ANYFLPPVLSSS |
| 188 S1 | 8.3%  | ELYTPTELAPAR |
| 189 S1 | 8.3%  | GTLYYSSKQHMS |
| 190 S1 | 0.0%  | AETTPRV----- |
| 191 S1 | 0.0%  | LTAETHAYILS- |
| 192 S1 | 0.0%  | CLSNNKGHC--- |
| 193 S1 | 8.3%  | SNPWSAQRELSV |
| 194 S1 | 0.0%  | CPNLTSARC--- |

|        |       |                |
|--------|-------|----------------|
| 195 S1 | 0.0%  | AQVTVLGSPLPT   |
| 196 S1 | 0.0%  | APTQGSPLPRML   |
| 197 S1 | 0.0%  | NPNEREATNTAH   |
| 198 S1 | 28.6% | GETPAPM-----   |
| 199 S1 | 0.0%  | CNHSGLLRC---   |
| 200 S1 | 8.3%  | VTSPAAPIHSAD   |
| 201 S1 | 9.1%  | SLPASWRSMPP-   |
| 202 S1 | 8.3%  | STLHPGRPSSHP   |
| 203 S1 | 8.3%  | DCNDKRKPTGDG   |
| 204 S1 | 0.0%  | KNLNTTGMYAAS   |
| 205 S1 | 0.0%  | KFIPGTY-----   |
| 206 S1 | 8.3%  | KMPHFTLSKVWA   |
| 207 S1 | 28.6% | TNPQPSL-----   |
| 208 S1 | 10.0% | AGTGKWQPRG--   |
| 209 S1 | 8.3%  | YTYTSYSNSSRA   |
| 210 S1 | 9.1%  | NKVTNGGAAQR-   |
| 211 S1 | 8.3%  | HLQTPQPEHNNL   |
| 212 S1 | 16.7% | TMDATTPQVTHY   |
| 213 S1 | 8.3%  | GMSRFNLDPTPA   |
| 214 S1 | 8.3%  | SYSQHYGIPNPW   |
| 215 S1 | 14.3% | EGPPLSR-----   |
| 216 S1 | 0.0%  | QPASDYATWPRS   |
| 217 S1 | 0.0%  | ATTHRDVQNAFR   |
| 218 S1 | 0.0%  | YWAATMP-----   |
| 219 S1 | 14.3% | HHPWRTA-----   |
| 220 S1 | 0.0%  | GLCQSIMRERLS   |
| 221 S1 | 0.0%  | GDRLIVP-----   |
| 222 S1 | 16.7% | SVSVEVKPIPTP   |
| 223 S1 | 25.0% | TLPAFGPRAHVL   |
| 224 S1 | 0.0%  | QYLENNRWKVPS   |
| 225 S1 | 0.0%  | QSLHQRL-----   |
| 226 S1 | 0.0%  | LTLSPSA-----   |
| 227 S1 | 25.0% | QSANLLNPAKTM   |
| 228 S1 | 25.0% | YPMRAPTSQAWH   |
| 229 S1 | 14.3% | IVPLHLV-----   |
| 230 S1 | 0.0%  | WVEVHYL-----   |
| 231 S1 | 0.0%  | SPHPSSK-----   |
| 232 S1 | 0.0%  | CLTSPMGKC---   |
| 233 S1 | 14.3% | GRLVPPL-----   |
| 234 S1 | 50.0% | AITLAP-----    |
| 235 S1 | 16.7% | SPNFSWLPLGTT   |
| 236 S1 | 14.3% | VATPAHH-----   |
| 237 S1 | 0.0%  | QVADTTQNTTGT   |
| 238 S1 | 8.3%  | SFKPPANHHAWY   |
| 239 S1 | 0.0%  | SDQLLLSSANW    |
| 240 S1 | 0.0%  | APAHPLT-----   |
| 241 S1 | 0.0%  | AMSPRHHSGPSV   |
| 242 S1 | 16.7% | IPLPPSRPFFK    |
| 243 S1 | 0.0%  | LSTHTTESRSMV   |
| 244 S1 | 25.0% | KPYNLYSGANQP   |
| 245 S1 | 0.0%  | CNANSMLC---    |
| 246 S1 | 0.0%  | CGHKNQFHC---   |
| 247 S1 | 16.7% | ALQRISPPQHWM   |
| 248 S1 | 16.7% | RAPASMP TARLA  |
| 249 S1 | 8.3%  | ANHLNPNASRVL   |
| 250 S1 | 0.0%  | DLNELYLRLSLRA  |
| 251 S1 | 28.6% | TMPNMGP-----   |
| 252 S1 | 0.0%  | AMNPVSP-----   |
| 253 S1 | 8.3%  | WR4PRATDVNLR   |
| 254 S1 | 0.0%  | HEGTRSTASYPK   |
| 255 S1 | 16.7% | TAPPTWLQTQWA   |
| 256 S1 | 14.3% | AFPVSHN-----   |
| 257 S1 | 16.7% | CETQAPMNVCP    |
| 258 S1 | 0.0%  | NNQLSDV-----   |
| 259 S1 | 11.1% | CTCRPNMNC---   |
| 260 S1 | 0.0%  | CSKSYEYNC---   |
| 261 S1 | 0.0%  | CASNLTAYY---   |
| 262 S1 | 9.1%  | TTHHYGYKSGY-   |
| 263 S1 | 0.0%  | QLSWNNRRFSI-   |
| 264 S1 | 8.3%  | QSPVNHYYHYHI   |
| 265 S1 | 0.0%  | LRLIGLRAPYS-   |
| 266 S1 | 0.0%  | RLHSDRALMID-   |
| 267 S1 | 0.0%  | CTQMR TAYC---  |
| 268 S1 | 14.3% | WPQKAQP-----   |
| 269 S1 | 12.5% | CLMRFRC-----   |
| 270 S1 | 8.3%  | TEQSWIRILCAW   |
| 271 S1 | 8.3%  | MWP TTTTHSSPYH |

|        |       |              |
|--------|-------|--------------|
| 272 S1 | 8.3%  | SSNSELWPLLSA |
| 273 S1 | 8.3%  | HYTADKRHAERL |
| 274 S1 | 25.0% | YPMRAPTCQAWH |
| 275 S1 | 0.0%  | GLGASYWWR--- |
| 276 S1 | 0.0%  | MLFYPRP----- |
| 277 S1 | 16.7% | NHHHQPLARNQS |
| 278 S1 | 0.0%  | ETANLRLQWGH  |
| 279 S1 | 11.1% | CRSDPPRWC--- |
| 280 S1 | 0.0%  | SPTSKVP----- |
| 281 S1 | 8.3%  | AWLTGPRALGPL |
| 282 S1 | 22.2% | CWTSAHAPC--- |
| 283 S1 | 0.0%  | CSGKWQPRC--- |
| 284 S1 | 0.0%  | CYQKMNPQC--- |
| 285 S1 | 11.1% | CTSKTISAC--- |
| 286 S1 | 42.9% | SPFRAPT----- |
| 287 S1 | 0.0%  | SCSYCLKSSTD  |
| 288 S1 | 25.0% | YPPRAWDTPHPH |
| 289 S1 | 0.0%  | CYYAHDATC--- |
| 290 S1 | 0.0%  | ARYHTHM----- |
| 291 S1 | 8.3%  | AWNTHGWASVTS |
| 292 S1 | 0.0%  | SPVWRSTTNGEA |
| 293 S1 | 16.7% | GITPSMAPGQRP |
| 294 S1 | 14.3% | LTPVPGQ----- |
| 295 S1 | 8.3%  | AWRPYQNADYTF |
| 296 S1 | 0.0%  | QHYNIVNTQSRV |
| 297 S1 | 33.3% | CINWARSAC--- |
| 298 S1 | 16.7% | GSPGQQRHNST  |
| 299 S1 | 0.0%  | QTQALYHSRQVH |
| 300 S1 | 14.3% | HTNTKPL----- |
| 301 S1 | 0.0%  | QALSWR-----  |
| 302 S1 | 16.7% | TPSWTSRPMAMP |
| 303 S1 | 28.6% | TSFQNL-----  |
| 304 S1 | 25.0% | EHPTWIAPAAPT |
| 305 S1 | 14.3% | IPTLPSS----- |
| 306 S1 | 8.3%  | HQITQPRSLSP  |
| 307 S1 | 42.9% | DETRAPL----- |
| 308 S1 | 0.0%  | AGDTTHGIPC-- |
| 309 S1 | 16.7% | KQLTSPPLNPV  |
| 310 S1 | 16.7% | RSPEQQRHMNST |
| 311 S1 | 25.0% | TMMQPMAGPG   |
| 312 S1 | 0.0%  | SYTTSLK----- |
| 313 S1 | 0.0%  | KVITIWQ----- |
| 314 S1 | 0.0%  | GLQARHI----- |
| 315 S1 | 0.0%  | MPKYLLQ----- |
| 316 S1 | 0.0%  | WHISPLTHTSLV |
| 317 S1 | 0.0%  | CDSHKRLK---  |
| 318 S1 | 8.3%  | TEQHW1KNIYAR |
| 319 S1 | 0.0%  | DGTIGLR----- |
| 320 S1 | 16.7% | TKTYPPRGAQS  |
| 321 S1 | 28.6% | AAPRPYR----- |
| 322 S1 | 25.0% | TPIGNKSPKSHA |
| 323 S1 | 0.0%  | NATLQSWVRDAR |
| 324 S1 | 0.0%  | NQDVPLF----- |
| 325 S1 | 28.6% | SAPLASF----- |
| 326 S1 | 8.3%  | EANSLAPLAPIW |
| 327 S1 | 0.0%  | HAIYPRQ----- |
| 328 S1 | 0.0%  | LPSQMYLGPDRS |
| 329 S1 | 22.2% | CQKHPSSC---  |
| 330 S1 | 0.0%  | CWTTRTVAC--- |
| 331 S1 | 0.0%  | GSHDWKR----- |
| 332 S1 | 16.7% | AWKPQPSQFSAS |
| 333 S1 | 0.0%  | QPELPTRLRLSL |
| 334 S1 | 0.0%  | CMSTMRRSC--- |
| 335 S1 | 0.0%  | CVKSHAGTC--- |
| 336 S1 | 25.0% | ALPNPPWTSHTA |
| 337 S1 | 0.0%  | NMHKELT----- |
| 338 S1 | 16.7% | AWPPPSMGPLAY |
| 339 S1 | 25.0% | THPLHTNLPTTS |
| 340 S1 | 16.7% | TKNMLSLPVC   |
| 341 S1 | 8.3%  | HSGNIHQPLRSM |
| 342 S1 | 0.0%  | GWSSYRG----- |
| 343 S1 | 0.0%  | SVCGMKPSRP-  |
| 344 S1 | 8.3%  | LLPDRNNAYS   |
| 345 S1 | 8.3%  | YYPASSTIQSRP |
| 346 S1 | 18.2% | NLTIASYPSW-  |
| 347 S1 | 41.7% | TIPRITPTSWV  |
| 348 S1 | 0.0%  | HPSLHALQGDHV |

|        |       |               |
|--------|-------|---------------|
| 349 S1 | 14.3% | TFINPSH-----  |
| 350 S1 | 0.0%  | HGLPVTTTRGAFG |
| 351 S1 | 16.7% | WPSSYLSPIPIYS |
| 352 S1 | 16.7% | HIWSRPMFYSPA  |
| 353 S1 | 0.0%  | CSCSNTKWC---  |
| 354 S1 | 28.6% | TWPHSIG-----  |
| 355 S1 | 25.0% | SGMSAPYTTVTA  |
| 356 S1 | 8.3%  | HWDPFSL SAYFP |
| 357 S1 | 8.3%  | HHLRTDMRWAT   |
| 358 S1 | 8.3%  | TPLGPILRNAHS  |
| 359 S1 | 8.3%  | YYPAGSTIQSRP  |
| 360 S1 | 8.3%  | LPPWKHKTSGVA  |
| 361 S1 | 0.0%  | DMKSTIPAPGG   |
| 362 S1 | 8.3%  | TLNMHKLHLPDS  |
| 363 S1 | 0.0%  | CPSTLRAQC---  |
| 364 S1 | 42.9% | AETRAPL-----  |
| 365 S1 | 9.1%  | ADYRSSVGGGK-  |
| 366 S1 | 28.6% | MPTMASS-----  |
| 367 S1 | 0.0%  | HNMVPSLLSTSK  |
| 368 S1 | 28.6% | EETSAPL-----  |
| 369 S1 | 0.0%  | DMVQTSTRRLAL  |
| 370 S1 | 0.0%  | CTNNHANIC---  |
| 371 S1 | 0.0%  | SDTISRHLVSMT  |
| 372 S1 | 8.3%  | HSIHSALTALAG  |
| 373 S1 | 0.0%  | HLFPQSNYGGHS  |
| 374 S1 | 0.0%  | FGNSDKLQTRAF  |
| 375 S1 | 0.0%  | RPLPPTP-----  |
| 376 S1 | 8.3%  | APTPRVAPLPVG  |
| 377 S1 | 8.3%  | SWPLYSRDSGLG  |
| 378 S1 | 0.0%  | MPLQRTL-----  |
| 379 S1 | 8.3%  | WTVQPTMLPMM   |
| 380 S1 | 11.1% | CIRMDGQKC---  |
| 381 S1 | 0.0%  | VRDSVTVNSRHS  |
| 382 S1 | 42.9% | SPFRAPP-----  |
| 383 S1 | 8.3%  | APPTSQAGDGV   |
| 384 S1 | 0.0%  | LPSAPRP-----  |
| 385 S1 | 8.3%  | YWAQSSNGAARL  |
| 386 S1 | 0.0%  | VYKPPGG-----  |
| 387 S1 | 8.3%  | TNTSWMTAMTPF  |
| 388 S1 | 0.0%  | ARQQTATTTCGC  |
| 389 S1 | 0.0%  | QPRPTSI-----  |
| 390 S1 | 42.9% | TSSKAMS-----  |
| 391 S1 | 0.0%  | WPTLPYT-----  |
| 392 S1 | 0.0%  | DCKPTTPTHC--  |
| 393 S1 | 8.3%  | DAADPPHVLTLT  |
| 394 S1 | 8.3%  | AFATSYSNLHDT  |
| 395 S1 | 16.7% | GGLLAV-----   |
| 396 S1 | 0.0%  | CLTDVGRAC---  |
| 397 S1 | 16.7% | AQAKYWSYTKTT  |
| 398 S1 | 16.7% | HPNQADLPPGGL  |
| 399 S1 | 0.0%  | RALMDMPAHRHA  |
| 400 S1 | 16.7% | TSVTMSSNEAWM  |
| 401 S1 | 11.1% | CYALKPPEC---  |
| 402 S1 | 8.3%  | QLSGMLEWQNLR  |
| 403 S1 | 0.0%  | CPDPTTRLC---  |
| 404 S1 | 0.0%  | LPRDLHATPQQI  |
| 405 S1 | 0.0%  | CDLPTSRIC---  |
| 406 S1 | 0.0%  | YHHNPYYQGAHD  |
| 407 S1 | 0.0%  | CLLDDLKRC---  |
| 408 S1 | 50.0% | AIPSPV-----   |
| 409 S1 | 14.3% | KIIPETY-----  |
| 410 S1 | 8.3%  | TTMFSTQSQKVP  |
| 411 S1 | 0.0%  | MNDHKTPNSSLR  |
| 412 S1 | 28.6% | VPPLLPL-----  |
| 413 S1 | 25.0% | ELKLTSAPAHTR  |
| 414 S1 | 0.0%  | FMKSPIPAPGG   |
| 415 S1 | 8.3%  | APIHLHSEPLLH  |
| 416 S1 | 0.0%  | CYGSTHHQC---  |
| 417 S1 | 14.3% | EPHRTTW-----  |
| 418 S1 | 0.0%  | GNTPSRA-----  |
| 419 S1 | 8.3%  | HPPTHNTAPWHA  |
| 420 S1 | 0.0%  | HDTYTAH-----  |
| 421 S1 | 8.3%  | TVSINLPTSTMR  |
| 422 S1 | 16.7% | HSTKANSMLTIA  |
| 423 S1 | 16.7% | DGTRAQDAGGRP  |
| 424 S1 | 8.3%  | YTPQKKIERAFG  |
| 425 S1 | 8.3%  | NPFNQHLHAQHP  |

|        |       |               |
|--------|-------|---------------|
| 426 S1 | 8.3%  | DHHSSTCRASAG  |
| 427 S1 | 8.3%  | HPHQASGWTSP   |
| 428 S1 | 8.3%  | WPTNAAHSLYRL  |
| 429 S1 | 16.7% | SDSAGMKPSPTP  |
| 430 S1 | 14.3% | GGVDAEW-----  |
| 431 S1 | 0.0%  | YERPLHRLSSID  |
| 432 S1 | 0.0%  | SSSDNHLAQLHT  |
| 433 S1 | 28.6% | TYAQLPI-----  |
| 434 S1 | 8.3%  | DSGYHRAPRPWP  |
| 435 S1 | 0.0%  | HDEGRRG-----  |
| 436 S1 | 0.0%  | SAHGTSTGVWP   |
| 437 S1 | 14.3% | ALHSARE-----  |
| 438 S1 | 8.3%  | MDNQDGMNACAG  |
| 439 S1 | 0.0%  | RPSSYMYAIPYR  |
| 440 S1 | 0.0%  | STMPKFN-----  |
| 441 S1 | 8.3%  | TVKAGWPYEDVP  |
| 442 S1 | 0.0%  | SHALPMTWSTAA  |
| 443 S1 | 8.3%  | AADYRSSVGGGK  |
| 444 S1 | 14.3% | VLPWYSP-----  |
| 445 S1 | 11.1% | CTDGPESSEC--- |
| 446 S1 | 16.7% | QRLIQDSVALWP  |
| 447 S1 | 42.9% | AGPLQPS-----  |
| 448 S1 | 0.0%  | SMVYGNRLLPSAL |
| 449 S1 | 0.0%  | WPLGDYP-----  |
| 450 S1 | 0.0%  | CKHFRTMSC---  |
| 451 S1 | 8.3%  | HQITQPTSLLS   |
| 452 S1 | 28.6% | TKTAASF-----  |
| 453 S1 | 42.9% | GETRAPV-----  |
| 454 S1 | 0.0%  | DARHQSWHPHDL  |
| 455 S1 | 8.3%  | LQPGHSVHNFSK  |
| 456 S1 | 0.0%  | CMWLSQRAC---  |
| 457 S1 | 0.0%  | GGSLVAKATAPN  |
| 458 S1 | 11.1% | CPGVHRSTC---  |
| 459 S1 | 0.0%  | CFLPDGVRC---  |
| 460 S1 | 0.0%  | LPVSKSVTQSHT  |
| 461 S1 | 0.0%  | NRAATMP-----  |
| 462 S1 | 0.0%  | QPHLTNPGPRHL  |
| 463 S1 | 25.0% | MDAKNPLGPTTY  |
| 464 S1 | 10.0% | YVSAGMKPSP--  |
| 465 S1 | 0.0%  | KLQTYNPHFRNP  |
| 466 S1 | 8.3%  | SGLPHLSLNAPR  |
| 467 S1 | 8.3%  | MHRSDLMSAAVR  |
| 468 S1 | 8.3%  | DLIKYPPVTAWS  |
| 469 S1 | 0.0%  | STYTNRA-----  |
| 470 S1 | 0.0%  | HGHPYQHLLRVL  |
| 471 S1 | 0.0%  | VPAPPAHQKLAK  |
| 472 S1 | 0.0%  | STWSHHLSSAGL  |
| 473 S1 | 11.1% | CTHSKSSQC---  |
| 474 S1 | 16.7% | QGYRPILPSHFL  |
| 475 S1 | 8.3%  | VPPINAVQVPFP  |
| 476 S1 | 8.3%  | WTSKDVSILSPA  |
| 477 S1 | 8.3%  | TPHKPLTSSSGP  |
| 478 S1 | 8.3%  | TPAAPYATFGAP  |
| 479 S1 | 0.0%  | ESLHQRL-----  |
| 480 S1 | 0.0%  | IDNHMQL-----  |
| 481 S1 | 0.0%  | CLDKPRFLC---  |
| 482 S1 | 0.0%  | CNMNRYNTC---  |
| 483 S1 | 0.0%  | CSSQYRPYC---  |
| 484 S1 | 8.3%  | APRLPQSLLPQL  |
| 485 S1 | 14.3% | TRVQLLH-----  |
| 486 S1 | 14.3% | MPMVPPK-----  |
| 487 S1 | 8.3%  | TPGNSFLDHMKQ  |
| 488 S1 | 8.3%  | GLPKNMFWDASS  |
| 489 S1 | 25.0% | TAAVDMPRSTP   |
| 490 S1 | 0.0%  | GLQGRHI-----  |
| 491 S1 | 0.0%  | YLTMPTP-----  |
| 492 S1 | 11.1% | CQHGRSSYC---  |
| 493 S1 | 14.3% | TQYFYLP-----  |
| 494 S1 | 14.3% | TFLNSLV-----  |
| 495 S1 | 8.3%  | STSKLTDLFSY   |
| 496 S1 | 0.0%  | AQDVTKNGLRRW  |
| 497 S1 | 0.0%  | ATGHPVWHHSS   |
| 498 S1 | 28.6% | GETHAPL-----  |
| 499 S1 | 0.0%  | GMWFSGL-----  |
| 500 S1 | 16.7% | LIAHSMPPRTRI  |
| 501 S1 | 42.9% | GGTRAPL-----  |
| 502 S1 | 0.0%  | SPAANGPQPRPL  |

|         |       |               |
|---------|-------|---------------|
| 503 S1  | 16.7% | NAHLHITPRSTL  |
| 504 S1  | 0.0%  | NPSSKQILSQVP  |
| 505 S1  | 0.0%  | KVLHSDRALMID  |
| 506 S1  | 0.0%  | CPLSSHPGC---  |
| 507 S1  | 16.7% | QPSKHISEARGF  |
| 508 S1  | 25.0% | SSKIQVSPATVP  |
| 509 S1  | 8.3%  | ADWHRTSTSPMS  |
| 510 S1  | 0.0%  | EYSLYRILHMDE  |
| 511 S1  | 8.3%  | GDTNPNPGKRSQI |
| 512 S1  | 0.0%  | ALQHQRAFQHQR  |
| 513 S1  | 0.0%  | HPMADHR-----  |
| 514 S1  | 41.7% | TQANAFSPAPRV  |
| 515 S1  | 28.6% | GITSAAT-----  |
| 516 S1  | 0.0%  | CQSVPSDRC---  |
| 517 S1  | 0.0%  | QAHLEKTAVPRM  |
| 518 S1  | 0.0%  | HATPQKPLHSRM  |
| 519 S1  | 0.0%  | CLSLKYQSC---  |
| 520 S1  | 25.0% | YPTRAPTSQAWH  |
| 521 S1  | 42.9% | WETRAPL-----  |
| 522 S1  | 0.0%  | NEHKDARSPHSP  |
| 523 S1  | 0.0%  | ITMPWHDTERS   |
| 524 S1  | 0.0%  | AKHVTAPHIREV  |
| 525 S1  | 11.1% | CNWLRTPC---   |
| 526 S1  | 8.3%  | GTLQLHNTHNST  |
| 527 S1  | 0.0%  | CHWPMSASC---  |
| 528 S1  | 8.3%  | QDALLAAPVISK  |
| 529 S1  | 8.3%  | YHMPPSATPLTA  |
| 530 S1  | 0.0%  | CHSGRSEHC---  |
| 531 S1  | 0.0%  | WLKDSRAAWIRH  |
| 532 S1  | 16.7% | AILRPQLMPGSS  |
| 533 S1  | 0.0%  | CGRINYGTC---  |
| 534 S1  | 14.3% | GSPRTP-----   |
| 535 S1  | 8.3%  | SHSLALLDSVAS  |
| 536 S1  | 0.0%  | CTQAFLPFC---  |
| 537 S1  | 11.1% | CLPMNNALC---  |
| 538 S1  | 0.0%  | LDYHQAWGHTRA  |
| 539 S1  | 25.0% | FGIHAKYPSPIY  |
| 540 S1  | 0.0%  | IPNDLNPRQLRG  |
| 541 S1  | 0.0%  | DQRDYHYGRGGT  |
| 542 S1  | 0.0%  | CLSNNIVKHC--  |
| 543 S1  | 8.3%  | NMFGSLTSHVTA  |
| 544 S1  | 16.7% | YWPRPDDSFWRP  |
| 545 S1  | 0.0%  | CTKTQLHVC---  |
| 546 S1  | 8.3%  | MNVLSSSASTES  |
| 547 S11 | 11.1% | CELRGDGWC---  |
| 548 S12 | 9.1%  | GCHSSTWRACG-  |
| 549 S13 | 18.2% | GCPTPHSGTCG-  |
| 550 S14 | 18.2% | GCMNQHSSACG-  |
| 551 S15 | 0.0%  | GCDSHKRLKCG-  |
| 552 S16 | 0.0%  | CPDLHHHMC---  |
| 553 S17 | 0.0%  | CLGQHAFTC---  |
| 554 S18 | 25.0% | SSNTAPHC----  |
| 555 S19 | 0.0%  | CHVLPNGNC---  |
| 556 S20 | 22.2% | CKPQYPLSC---  |
| 557 S21 | 0.0%  | CQTARTPAC---  |
| 558 S22 | 11.1% | CNQSQPKHC---  |
| 559 S23 | 22.2% | CTPSKISVC---  |
| 560 S24 | 11.1% | CVSPGPRLC---  |
| 561 S25 | 11.1% | CYALSGVPC---  |
| 562 S26 | 0.0%  | CKHPPQPFC---  |
| 563 S27 | 11.1% | CHQSKPLLC---  |
| 564 S28 | 0.0%  | CPGPFSNWC---  |
| 565 S29 | 11.1% | CPHKTHLPC---  |
| 566 S30 | 0.0%  | CVFPLSHYC---  |
| 567 S31 | 33.3% | CNNIAPSSC---  |
| 568 S32 | 0.0%  | CTLGMQFQC---  |
| 569 S33 | 0.0%  | CTNPTGMLC---  |
| 570 S34 | 22.2% | CSNMAPRSC---  |
| 571 S35 | 0.0%  | CSMAPNMSC---  |
| 572 S36 | 0.0%  | CSDLTMEAC---  |
| 573 S37 | 0.0%  | CPWPYKYSC---  |
| 574 S38 | 0.0%  | CFGGNFHRC---  |
| 575 S39 | 0.0%  | CLTTSQQTC---  |
| 576 S40 | 11.1% | CTANSQSFC---  |
| 577 S14 | 0.0%  | CQEPLDESC---  |
| 578 S42 | 0.0%  | CQMSMFARC---  |
| 579 S43 | 0.0%  | CPLTPKAYC---  |



|                |       |               |
|----------------|-------|---------------|
| 580 S44        | 0.0%  | CNNSHTALC---  |
| 581 S45        | 0.0%  | CLSSDITLC---  |
| 582 S46        | 11.1% | CLTHGPKYC---  |
| 583 S47        | 0.0%  | CLGKDLRTC---  |
| 584 S48        | 11.1% | CAPKTHPLC---  |
| 585 S49        | 0.0%  | CPTGLMKYC---  |
| 586 S50        | 22.2% | CTWKAPLQC---  |
| 587 S51        | 0.0%  | CSHILGPSC---  |
| 588 S52        | 0.0%  | CLSTSQYSC---  |
| 589 S53        | 11.1% | CGNSNPKSC---  |
| 590 S54        | 16.7% | YCPRYVRRKLEN  |
| 591 S55        | 0.0%  | NGYEIEWYSWVT  |
| 592 S56        | 0.0%  | CNGYEIEWYSWV  |
| 593 S57        | 0.0%  | YLTMPPTP----- |
| 594 S58        | 0.0%  | WPTPPYA-----  |
| 595 S59        | 28.6% | TPHNTVS-----  |
| 596 S60        | 14.3% | SLPAHAR-----  |
| 597 S61        | 0.0%  | HSSLQTP-----  |
| 598 S62        | 14.3% | YSIPKSS-----  |
| 599 S63        | 0.0%  | ALQPRYL-----  |
| 600 S64        | 0.0%  | GREVD-----    |
| consensus/100% |       | .....         |
| consensus/90%  |       | .....         |
| consensus/80%  |       | t.....        |
| consensus/70%  |       | t.....        |
